# Supplementary material for: circRNA Expression Profile in Dental Pulp Stem Cells during Odontogenic Differentiation
Source: Stem Cells Int. 2020 Sep 1;2020:5405931. doi: 10.1155/2020/5405931 (PMC7482017; doi:10.1155/2020/5405931)
Supplement: Supplementary materials — Additional file 1: Table S1: the expression profiles of upregulated circRNAs in induced and noninduced hDPSCs. Additional file 2: Table S2: the expression profiles of downregulated circRNAs in induced and noninduced hDPSCs. Additional file 3: certificate of English editing. [file 5405931.f1.zip]

Archive with 2 entries (2 files):
- Table S1. The expression profiles of up-regulated circRNAs in induced and non-induced hDPSCs..xlsx
- Table S2. The expression profiles of down-regulated circRNAs in induced and non-induced hDPSCs..xlsx
