# Supplementary material for: circRNA Expression Profile in Dental Pulp Stem Cells during Odontogenic Differentiation
Source: Stem Cells Int. 2020 Sep 1;2020:5405931. doi: 10.1155/2020/5405931 (PMC7482017; doi:10.1155/2020/5405931)
Supplement: Supplementary materials — Additional file 1: Table S1: the expression profiles of upregulated circRNAs in induced and noninduced hDPSCs. Additional file 2: Table S2: the expression profiles of downregulated circRNAs in induced and noninduced hDPSCs. Additional file 3: certificate of English editing. [file 5405931.f1.zip › Table S1. The expression profiles of up-regulated circRNAs in induced and non-induced hDPSCs..xlsx]

## Sheet: Sheet1
Table S1. The expression profiles of up-regulated circRNAs in induced and non-induced hDPSCs.
	P-value and FDR		Fold change and Regulation		Annotations
probeID	P-value	FDR	FC (abs)	Regulation	circRNA	Alias	source	chrom	strand	txStart	txEnd	circRNA_type	best_transcript	GeneSymbol	Sequence
ASCRP3005562	0.00126927	0.343603	19.0333	up	hsa_circRNA_104101	hsa_circ_0001599	circBase	chr6	-	35586872	35610620	exonic	NM_004117	FKBP5	CGAAGGAGCAACAGTAGAAAGTTCTCTACTTAAAAGACAATGACTACTGATGAAGGTGCC
ASCRP3001707	0.00386369	0.343603	15.9528	up	hsa_circRNA_406763		25070500	chr6	-	35604790	35614627	intronic	ENST00000540787	FKBP5	AGAAATGAACCATTTGTCTTTAGTCTTGGCAAAGGTGTTTGCTGACTAGCACTTTGGAGA
ASCRP3000836	0.00101391	0.343603	8.28571	up	hsa_circRNA_002161	hsa_circ_0001600	circBase	chr6	-	35586872	35614627	intronic	ENST00000540787	FKBP5	AATCCAAACGAAGGAGCAACAGTAGAAAGTGTTTGCTGACTAGCACTTTGGAGAGTGTAT
ASCRP3000835	0.00244439	0.343603	5.5382	up	hsa_circRNA_076155	hsa_circ_0076155	circBase	chr6	-	35586872	35604935	exonic	NM_004117	FKBP5	AATCCAAACGAAGGAGCAACAGTAGAAAATTGTCAAAAGAGTGGGGAATGGTGAGGAAAC
ASCRP3005602	0.0108529	0.350535	3.78224	up	hsa_circRNA_005044	hsa_circ_0005044	circBase	chr11	+	36415395	36424928	intronic	ENST00000389693	PRR5L	CGAGCTCTATGCCCTGAACGAAAACATCAGAAGAGGCAATTCGGACATAAAGAGAAACAT
ASCRP3013548	0.00633522	0.346574	3.39351	up	hsa_circRNA_405468		25070500	chr16	+	56642600	56642903	intronic	ENST00000245185	MT2A	TTTTCTCCTTGCAGAGGCTGGGGATGCCCAGTGTAGACTGTAGCGCTAGAGAAGCAATTT
ASCRP3000881	0.000980814	0.343603	3.34355	up	hsa_circRNA_406761		25070500	chr6	-	35565024	35614627	sense overlapping	NM_004117	FKBP5	AATGCAGCGGGAAGAACAATGTATTTTATATCTTGGACCAAGGTGTTTGCTGACTAGCAC
ASCRP3007147	0.00682455	0.346574	3.28209	up	hsa_circRNA_103931	hsa_circ_0073805	circBase	chr5	-	127854965	127863660	exonic	NM_001999	FBN2	CTTGTGTTTATGGGTTCACTGGTCCACAGTGTGAAAGAGTTCAGCAGTGCAGTGTGAGAT
ASCRP3009603	0.0163374	0.361949	3.14435	up	hsa_circRNA_404879		25070500	chr11	+	36415395	36440853	sense overlapping	NM_024841	PRR5L	GGCGGCTGTTGAAGAGTGAACTTGGATCATTCATTACAGACTATTTTCAGAAGAGGCAAT
ASCRP3000573	0.014106	0.361639	2.4229	up	hsa_circRNA_102674	hsa_circ_0053932	circBase	chr2	+	33525517	33525640	exonic	NM_000627	LTBP1	AAGACCAGTGTGAAGATATTGATGAATGTCAGCAAGGGAATCTATGTGTAAACGGGCAGT
ASCRP3007629	0.0244071	0.379734	2.1322	up	hsa_circRNA_001589	hsa_circ_0001589	circBase	chr6	-	26234499	26234709	sense overlapping	NM_005320	HIST1H1D	GAAGGCAGCTCCGAAGAAAAACATCAAAAAGACTCCTAAGAAGGTAAAGAAGCCAGCAAC
ASCRP3008674	0.00981664	0.346574	2.10503	up	hsa_circRNA_102673	hsa_circ_0053907	circBase	chr2	+	33442618	33447218	exonic	NM_000627	LTBP1	GATGGAATGCCTACCGGGTTATAAGCGGGTTAACAACACCTTTTGCCAAGTGTGGCAAAG
ASCRP3002570	0.0104298	0.348043	2.09312	up	hsa_circRNA_100798	hsa_circ_0004453	circBase	chr11	+	36103202	36120011	exonic	NM_174902	LDLRAD3	ATAACTGTCAAGACAACAGTGATGAGGAAAGCTGTGAAAGTTCTCAAGCCAAGGCTAAGT
ASCRP3013072	0.0118383	0.355122	2.09222	up	hsa_circRNA_102676	hsa_circ_0053936	circBase	chr2	+	33540210	33540336	exonic	NM_000627	LTBP1	TTCTCAATCTCTGCAGATGGCCGTACGTGTGAAGATATTAATGAATGTGAACATCCAGGG
ASCRP3005871	0.00754846	0.346574	1.96957	up	hsa_circRNA_103249	hsa_circ_0063756	circBase	chr22	+	45939280	45943084	exonic	NM_001996	FBLN1	CTACCAGCTCAGCGATGTGGATGGAGTCACCTGTGAAGATGTCAACGAGTGCCAGCGCTA
ASCRP3008303	0.0222145	0.371554	1.90435	up	hsa_circRNA_003567	hsa_circ_0003567	circBase	chr1	-	16528276	16529069	exonic	NM_153213	ARHGEF19	GAGGACAAGGAGGTCATCAGTGAGGGGGAAGGCTAGGGAAGTTTGCCGTTTTCGTCCATG
ASCRP3010944	0.0416269	0.410433	1.86879	up	hsa_circRNA_034537	hsa_circ_0034537	circBase	chr15	+	39884768	39889668	exonic	NM_003246	THBS1	TATATTTATACTGGACTCTGACTCAGACCGCATTGGAGATACCTGTGACAACAATCAGGA
ASCRP3004265	0.0264906	0.386574	1.8328	up	hsa_circRNA_102858	hsa_circ_0007941	circBase	chr2	-	175779785	175816930	exonic	NM_001822	CHN1	CAGCCAGGGACCTACACTTTGGCTTTAAGATACAGATGAATATAGACCTCCTGTTTGGAA
ASCRP3009518	0.00374683	0.343603	1.83168	up	hsa_circRNA_004062	hsa_circ_0004062	circBase	chr2	-	175740515	175742856	intronic	ENST00000425395	CHN1	GGATGACATTTATTTGGAAGTCAAACCAGAAACTTCAGGCTCTACTACGATGGCAAGCAC
ASCRP3004092	0.00787904	0.346574	1.76677	up	hsa_circRNA_101475	hsa_circ_0034528	circBase	chr15	+	39883705	39885003	exonic	NM_003246	THBS1	CAGAAGGACTCTGACGGTATCCTCAATGAACGGGACAACTGCCAGTACGTCTACAATGTG
ASCRP3009523	0.0187492	0.365735	1.76167	up	hsa_circRNA_102813	hsa_circ_0007052	circBase	chr2	-	122363276	122363756	exonic	NM_015282	CLASP1	GGATGGACTTGCTACCTCTTGGGTGAACTCTAGCAATTACAAGAATGGACTGCTGAATTA
ASCRP3009438	0.0188544	0.365735	1.72588	up	hsa_circRNA_063745	hsa_circ_0063745	circBase	chr22	+	45921422	45972988	exonic	NM_006486	FBLN1	GGACTCTTTTGACATCATCAAGCGTTACATGGACGGCATGACCGTGGGATGGTGCAGGAG
ASCRP3001329	0.0455256	0.410433	1.71738	up	hsa_circRNA_406847		25070500	chr6	-	129823749	129879311	sense overlapping	uc003qbq.3	BC035400	ACCCAGGAGAGAAAAACAGGAGATTATGGACTGTTCTTTAAAAAGGGCAGCATAAGATCA
ASCRP3009623	0.0196721	0.366401	1.71359	up	hsa_circRNA_056297	hsa_circ_0056297	circBase	chr2	-	122159084	122363756	exonic	NM_015282	CLASP1	GGCTCTAGATGTCACAAGAATGGACTGCTGAATTATGAAGTATTTCAGACCCAGTAGTAG
ASCRP3002897	0.0300478	0.392412	1.70782	up	hsa_circRNA_104722	hsa_circ_0085923	circBase	chr8	-	145011146	145011239	exonic	NM_000445	PLEC	ATCTGGACAATCATTCTGCACTTCCAGGTGAAGCTGGTGAACATCAGGAATGATGACATC
ASCRP3010874	0.0128071	0.361639	1.69628	up	hsa_circRNA_406710		25070500	chr5	+	170585337	170597207	exonic	uc003may.2	RANBP17	TAGGAATAACAGATGACAACCACGTTCTAGAGACGTTCATGACAAAAATGCCTTGCGTGG
ASCRP3002739	0.0291775	0.392153	1.68255	up	hsa_circRNA_100417	hsa_circ_0015579	circBase	chr1	+	182853747	182853948	exonic	NM_001357	DHX9	ATCAACCTTATGATTGGCAGTACACGGATTAAACTGCAAATATCTCATGAAGCTGCTGCC
ASCRP3007404	0.0338765	0.401825	1.66045	up	hsa_circRNA_048148	hsa_circ_0048148	circBase	chr19	+	1037623	1039064	exonic	uc002lqu.3	CNN2	GAAATACGACTGTGGACCAAACGCAATAAAACCTCTGTTTGTACGAAGAGTGGGCATGAC
ASCRP3004198	0.00549741	0.346574	1.64014	up	hsa_circRNA_101659	hsa_circ_0037060	circBase	chr15	-	100692816	100695525	exonic	NM_139057	ADAMTS17	CAGATCCTGTTTGGCATGAATGCCACCTTCTGCAGAAACATGGAGCTTGGGCATGAACCA
ASCRP3007477	0.0312335	0.394739	1.61792	up	hsa_circRNA_057748	hsa_circ_0057748	circBase	chr2	+	202010100	202013775	exonic	NM_003879	CFLAR	GAACCAGTGAAGAAATCCATTCAGGAATCAGAAGCTTTTTTGCCTCAGCTCCATAATGGG
ASCRP3001732	0.0478151	0.410769	1.61767	up	hsa_circRNA_000479	hsa_circ_0000479	circBase	chr13	-	43528083	43544806	exonic	NM_033255	EPSTI1	AGAAGAGAAGCATTTAGAGAGCATCAGCAATACACAAGTGCATACACCTTGATAGCACCA
ASCRP3011497	5.74369e-05	0.240502	1.61097	up	hsa_circRNA_102606	hsa_circ_0052490	circBase	chr2	+	7154584	7170346	exonic	NM_014746	RNF144A	TCGGACACAGTGCCTGAAACAGTATGTTGAGCTCTTGATCAAAGAAGGATTAGAAACTGC
ASCRP3006287	0.00185742	0.343603	1.59155	up	hsa_circRNA_102409	hsa_circ_0006392	circBase	chr19	+	3425103	3435205	exonic	NM_005597	NFIC	CTCGCCCACGAGTAGCAGCCGCAACTGGACGGAGGACATGGAAGGAGATGCAGAGCAAAG
ASCRP3013585	0.0409736	0.410056	1.58736	up	hsa_circRNA_005230	hsa_circ_0005230	circBase	chr1	-	172109619	172113577	sense overlapping	NR_038397	DNM3OS	TTTTTAATTTCCACCAATATACTCTTTGTTTTGCACACTAGGGACCAAGAAGCCCTCGGG
ASCRP3000479	0.00472562	0.346574	1.58735	up	hsa_circRNA_105023	hsa_circ_0002153	circBase	chrX	+	107083899	107097934	exonic	NM_012216	MID2	AACTAGAAAATCAAATGGCCAAACTAATACAGATCTGCCAGCAGGTTGAGGTGAAAGCCC
ASCRP3013311	0.0257795	0.385121	1.58033	up	hsa_circRNA_102792	hsa_circ_0007859	circBase	chr2	-	102035312	102038934	exonic	NM_001145664	RFX8	TTTAAATGCTACGACGTCCAGCTGTACAAGTGTGAAGATCATTCACCGATGAAGACAGAC
ASCRP3004032	0.0485973	0.410769	1.56081	up	hsa_circRNA_009618	hsa_circ_0009618	circBase	chr1	-	8923293	8928116	exonic	NM_001428	ENO1	CACTGGGCAGAAACTGAACGTCACAGAACAAGAGAAGATTGACAAACTGATGATCGAGAT
ASCRP3004078	0.0105133	0.349424	1.56026	up	hsa_circRNA_103244	hsa_circ_0008806	circBase	chr22	+	42204878	42209826	exonic	NM_024821	CCDC134	CAGAACCCATTTAAAATCGACCGCACAGAGCTCAAGAGGTTTGGATATGGACCTTCTTCA
ASCRP3012311	0.000948628	0.343603	1.55815	up	hsa_circRNA_100799	hsa_circ_0006988	circBase	chr11	+	36248634	36248980	exonic	NM_174902	LDLRAD3	TGGACCAGAGAACCCGGCAGTGGGCAGGTGTTTGTGACTTCAGAGAACCAACTTGTGTAT
ASCRP3002893	0.0480316	0.410769	1.53864	up	hsa_circRNA_102894	hsa_circ_0001092	circBase	chr2	+	202010100	202014558	exonic	NM_003879	CFLAR	ATCTGCCTGATAATCGATTGCATTGGCAATGAGACAGCTCCATAATGGGAGAAGTAAAGA
ASCRP3012173	0.0211337	0.370559	1.53013	up	hsa_circRNA_103726	hsa_circ_0070764	circBase	chr4	+	120138704	120177678	exonic	NM_019050	USP53	TGCGGTACATTTCTACAACAGCCTTATGATGCTTGGGATTTGCTTTACATTCTAAGTGGA
ASCRP3006459	0.0124313	0.361639	1.51301	up	hsa_circRNA_103243	hsa_circ_0001238	circBase	chr22	+	42204878	42206295	exonic	NM_024821	CCDC134	CTGAAGGATGCTCAAGAGGTTTGGATATGGACCTTCTTCAATTCCTGGCCTTCCTCTTTG
ASCRP3004372	0.0166013	0.362157	1.50451	up	hsa_circRNA_402031		25242744	chr19	+	8435939	8436406	exonic	NM_139314	ANGPTL4	CAGGGACAAGAACTGCGCCAAGAGCCTCTCTGATGGAGGCTGGACAGTAATTCAGAGGCG
