# Supplementary material for: circRNA Expression Profile in Dental Pulp Stem Cells during Odontogenic Differentiation
Source: Stem Cells Int. 2020 Sep 1;2020:5405931. doi: 10.1155/2020/5405931 (PMC7482017; doi:10.1155/2020/5405931)
Supplement: Supplementary materials — Additional file 1: Table S1: the expression profiles of upregulated circRNAs in induced and noninduced hDPSCs. Additional file 2: Table S2: the expression profiles of downregulated circRNAs in induced and noninduced hDPSCs. Additional file 3: certificate of English editing. [file 5405931.f1.zip › Table S2. The expression profiles of down-regulated circRNAs in induced and non-induced hDPSCs..xlsx]

## Sheet: Sheet1
Table S2. The expression profiles of down-regulated circRNAs in induced and non-induced hDPSCs.
	P-value and FDR		Fold change and Regulation		Annotations
probeID	P-value	FDR	FC (abs)	Regulation	circRNA	Alias	source	chrom	strand	txStart	txEnd	circRNA_type	best_transcript	GeneSymbol	Sequence
ASCRP3004844	0.00194183	0.343603	4.14478	down	hsa_circRNA_405040		25070500	chr12	+	94562928	94580249	exonic	NM_005761	PLXNC1	CATTCGCTACAAAGAAAGAAGGGGATCAACCTGAAAGAGTCCAACCAATCGCATCATCTA
ASCRP3009407	0.00567164	0.346574	3.85014	down	hsa_circRNA_079813	hsa_circ_0079813	circBase	chr7	+	33390830	33427756	exonic	NM_198428	BBS9	GGACACCTTGTTAGATGGAACCTACAAGCAGCACCAGATTTGACTAGAACAGTAAGCTTT
ASCRP3003057	0.0122291	0.361639	3.74704	down	hsa_circRNA_008336	hsa_circ_0008336	circBase	chr7	+	33397466	33427756	exonic	NM_014451	BBS9	ATGGAACCTACAAGCAGGCATTCCGCGAGTTATCCAATGTAAATTTAGACTTCCCCTAAA
ASCRP3004475	0.0153933	0.361639	3.70535	down	hsa_circRNA_101655	hsa_circ_0000660	circBase	chr15	+	94899365	94945248	exonic	NM_018349	MCTP2	CAGTGGGAATCCACATTAAGAAGTACAATAGCATTCGCGTCCTCTTTGATACGCAACCTA
ASCRP3009344	0.00559902	0.346574	3.61588	down	hsa_circRNA_104343	hsa_circ_0079812	circBase	chr7	+	33388679	33427756	exonic	NM_014451	BBS9	GGAACCTACAAGCAGGTCACACTGCAGAACAGAGTGATATTGCAAAAAGCCAAATTATCA
ASCRP3007513	0.038702	0.409265	3.251	down	hsa_circRNA_103728	hsa_circ_0070805	circBase	chr4	-	120460114	120528452	exonic	NM_001083	PDE5A	GAAGAAACAAGAGAGCTACAGTCGTTAGCGAGAAATGGTCAATGCATGGTTTGCTGAGAG
ASCRP3006806	0.0139708	0.361639	3.21146	down	hsa_circRNA_104566	hsa_circ_0004458	circBase	chr8	-	18656804	18662408	exonic	NM_015310	PSD3	CTGTGCAATAATGCTTCTTAATACCGATCTACATGGCCACCAATGCTGGGGTGAAAACAA
ASCRP3001473	0.00285056	0.343603	3.06997	down	hsa_circRNA_003333	hsa_circ_0003333	circBase	chr15	+	94983404	95001475	exonic	NM_018349	MCTP2	ACGTCTTGGAGGAAATAGCTTCTTTTGGAGAAAGGATTAAGAAGTATTTTTGATCACTGT
ASCRP3010495	0.00693115	0.346574	2.85858	down	hsa_circRNA_103777	hsa_circ_0001461	circBase	chr4	-	187627716	187630999	exonic	NM_005245	FAT1	GTTTTCAAAATAGGTGAAGAGACAGATTCCCGACAGTTAAGCAATGGGGAGACATTTGGC
ASCRP3000114	0.0267691	0.386574	2.80794	down	hsa_circRNA_103727	hsa_circ_0008144	circBase	chr4	-	120460114	120488299	exonic	NM_001083	PDE5A	AAACAAGAGAGCTACAGTCGTTAGCGGTTGTTGGTGTAGCCCAGGCCATCAACAAGAAAT
ASCRP3009846	0.0107615	0.350535	2.73414	down	hsa_circRNA_104565	hsa_circ_0002111	circBase	chr8	-	18622958	18662408	exonic	NM_015310	PSD3	GTAAATGAGGGTGTTGATTTCTCCAAGGATCTGCTGAAACAATGCTGGGGTGAAAACAAC
ASCRP3004199	0.0225781	0.372089	2.69712	down	hsa_circRNA_000319	hsa_circ_0000319	circBase	chr11	-	62291306	62292503	intronic	ENST00000257247	AHNAK	CAGATCTCAATGTGGAAGGTCCGGAGGGAGGCTTGAAAGGCCCCAAAGTGGATATTAATG
ASCRP3011628	0.0472987	0.410769	2.62728	down	hsa_circRNA_403431		25242744	chr5	+	128977551	129015614	exonic	NM_133638	ADAMTS19	TCTGCCAAAGGTCCTACTACAGCACCTTTACATCTTCTGCATGTTATTTGCACAGGATTA
ASCRP3011320	0.00966796	0.346574	2.53581	down	hsa_circRNA_405647		25070500	chr18	-	346294	357522	exonic	NM_130386	COLEC12	TCCAAGCATGGTCAGCTCATCAAGAATTTTACAATACTACAAGGTATTCAGGAAGGAACA
ASCRP3007209	0.0113399	0.351632	2.52561	down	hsa_circRNA_061346	hsa_circ_0061346	circBase	chr21	-	27372329	27425664	exonic	NM_000484	APP	CTTTGACACAGAAGAGTACTGCATGGCCGTGTGTGGCAGCGCCATTGGTGAGTTTGTAAG
ASCRP3003271	0.0188641	0.365735	2.43676	down	hsa_circRNA_000317	hsa_circ_0000317	circBase	chr11	-	62288378	62288522	intronic	ENST00000257247	AHNAK	ATTGAAGGTCCTGAAGGGAAGCTCAAAGCTCCCAAAATCTCTATGCCTGACTTTGATTTG
ASCRP3004537	0.0141558	0.361639	2.41795	down	hsa_circRNA_084765	hsa_circ_0084765	circBase	chr8	-	72229786	72246409	exonic	NM_000503	EYA1	CATACAGCTACCAGATGCAAGTTAAAACAGAGCCAATGAGCAGCAGTGAAACAGCTTCAA
ASCRP3000121	0.0189684	0.365735	2.38309	down	hsa_circRNA_104385	hsa_circ_0006365	circBase	chr7	+	65751497	65751696	exonic	NM_003596	TPST1	AAACACTCGAAGGAGTGGAGAGATCTACAGACCAAGTAATCAAGCCAGTCAATGTAGGAG
ASCRP3012492	0.0436135	0.410433	2.36497	down	hsa_circRNA_073810	hsa_circ_0073810	circBase	chr5	+	128861976	128864370	exonic	NM_133638	ADAMTS19	TGGGGGGAAGACATGACTTCAGTGGATGCAGCTATACTTATAACAAGATAAAGGAAGACC
ASCRP3007687	0.0305044	0.392523	2.31178	down	hsa_circRNA_406403		25070500	chr3	+	183388821	183390272	exonic	NM_017644	KLHL24	GAATACATTCAGCCGTCAGGTATATGTTGTCGGTGGCTATGATGGGCAAAACAGACTTAG
ASCRP3005292	0.0205805	0.369737	2.29433	down	hsa_circRNA_103114	hsa_circ_0003323	circBase	chr21	-	27326903	27328069	exonic	NM_000484	APP	CCGAGGAGATTCAGGATGAAGTTGCCTCGTCACGTGTTCAATATGCTAAAGAAGTATGTC
ASCRP3011889	0.00697514	0.346574	2.29385	down	hsa_circRNA_103118	hsa_circ_0061396	circBase	chr21	+	30701807	30702014	exonic	NM_001186	BACH1	TGAGAAGCTGGTAAAACTGCCATTCAATGCACAACGGATAATTTCACTGTCTCGAAATGA
ASCRP3008804	0.00827856	0.346574	2.28627	down	hsa_circRNA_104066	hsa_circ_0004032	circBase	chr6	-	16658006	16753578	exonic	NM_000332	ATXN1	GATTTCAGCCTGCACGGATGGTCTTGAAACACAAATGGTTTTTGGAGCATCGTGCATCAA
ASCRP3003276	0.00327106	0.343603	2.27211	down	hsa_circRNA_103117	hsa_circ_0061395	circBase	chr21	+	30698379	30702014	exonic	NM_001186	BACH1	ATTGAGAAGCTGGTGACAGTTAAAGGATTTGAACCTTTAATTCAGTTTGCCTACACTGCT
ASCRP3011655	0.0151647	0.361639	2.2699	down	hsa_circRNA_407045		25070500	chr8	-	18725183	18730243	exonic	NM_015310	PSD3	TCTGGGGAAGGTGATCATGGAGGAAGCACTTTACTCCCACCAAATGTCACAAATGAATTT
ASCRP3003832	0.0387378	0.409265	2.25828	down	hsa_circRNA_406580		25070500	chr4	+	189397851	189407019	exonic	NR_033869	LINC01060	CACACTCATTAGATAAAGTGTCGCATACTCTTTGATAAGTAACACTGAAGAATGCAGTTT
ASCRP3000936	0.00590112	0.346574	2.22801	down	hsa_circRNA_103116	hsa_circ_0001181	circBase	chr21	+	30693541	30702014	exonic	NM_001186	BACH1	AATTGAGAAGCTGGTTGATGATAATTAGAAGCATGCTTTCCACTGAACTTCCCGACAACA
ASCRP3012396	0.0267066	0.386574	2.22703	down	hsa_circRNA_403996		25242744	chr8	-	18490122	18513195	exonic	NM_015310	PSD3	TGGATTCTTGGCTCGGAAAATTCATGCAGATATGGATGGAAAGAAGAGCTCTGTACAACT
ASCRP3000149	0.0299335	0.392153	2.17823	down	hsa_circRNA_101996	hsa_circ_0000745	circBase	chr17	+	20107645	20109225	exonic	NM_152904	SPECC1	AAACGGTGAAATTAAACATGTTTCCAGTCTGCTGGCCAAGGGGCCTTTACAACAACTAAA
ASCRP3011793	0.0357746	0.404626	2.16378	down	hsa_circRNA_103527	hsa_circ_0006667	circBase	chr3	+	183368083	183390272	exonic	NM_017644	KLHL24	TGAAGATTACTGGATGCACGTACAGAATACATTCAGCCGTCAGCCACATAAAGAAGATCC
ASCRP3002152	0.00853612	0.346574	2.13616	down	hsa_circRNA_406135		25070500	chr21	+	30693541	30724134	exonic	NR_027655	BACH1	AGCTGCTAAGATAAGGTTGATGATAATTAGAAGCATGCTTTCCACTGAACTTCCCGACAA
ASCRP3005919	0.0362507	0.405327	2.11666	down	hsa_circRNA_102687	hsa_circ_0002938	circBase	chr2	+	36726361	36749456	exonic	NM_016441	CRIM1	CTACTGCATAGAACCAACCATCATCACAGTTGATCCACCTGCATGTGGGGAGTTATCAAA
ASCRP3011516	0.0104336	0.348043	2.10784	down	hsa_circRNA_404687		25070500	chr1	+	236332005	236347206	exonic	NM_003272	GPR137B	TCGTTTATTTCTTCCGAGTTAGAAATCCTACAAAGGACCTTGTGATTTTCAAAGCCAAGT
ASCRP3005854	0.0237384	0.376137	2.09411	down	hsa_circRNA_082547	hsa_circ_0082547	circBase	chr7	-	135611502	135636378	exonic	NM_145808	MTPN	CTACAGCTAAGGAGAAGATGTCAACCGGACACTAGAAGGTGGAAGGAAACCTCTTCATTA
ASCRP3010226	0.0128331	0.361639	2.07842	down	hsa_circRNA_102460	hsa_circ_0049657	circBase	chr19	+	13183860	13186485	exonic	NM_002501	NFIX	GTGGATGCAGAATCCGGACAATCAGATAGTTCAAACCAGCAAGGAGATGCGGACATCAAA
ASCRP3002303	0.00217274	0.343603	2.0733	down	hsa_circRNA_404225		25242744	chr9	+	103261046	103323802	exonic	NM_003692	TMEFF1	AGGCTTCTTGTAGAATTAAATGTGAGGGAGTCTGACGTAAGAGTTTGTGATGAGTCATCA
ASCRP3005563	0.0195736	0.366401	2.07246	down	hsa_circRNA_006491	hsa_circ_0006491	circBase	chr18	+	42281139	42281797	exonic	NM_015559	SETBP1	CGAAGGAGGAAGAAAGAAGCCACTCCAAAAAGAAGTTGCAGATCTGATCTCTTCTGAACA
ASCRP3000587	0.00210208	0.343603	2.06919	down	hsa_circRNA_007672	hsa_circ_0007672	circBase	chr7	+	65705311	65706257	exonic	NM_003596	TPST1	AAGAGATGATTGGGAAAGCTGGGGGAGTGTCTCTGTCAAAATGTTGGTTATCTTTCTGAA
ASCRP3004977	0.00012882	0.240502	2.06895	down	hsa_circRNA_103429	hsa_circ_0066776	circBase	chr3	+	110830876	110845182	exonic	NM_015480	PVRL3	CCAATTCCCTTGGTCAAAGAAGTGACCAAAAAGTCATCTACATTTCAGGTGCCTTAGCTG
ASCRP3012065	0.00283794	0.343603	2.06416	down	hsa_circRNA_404226		25242744	chr9	+	103271286	103279053	exonic	NM_003692	TMEFF1	TGCAGAAAATGTTGGTGCCATACAAATTATATTCCTGTCTGTGGATCAAATGGGGACACT
ASCRP3005290	0.00613243	0.346574	2.04056	down	hsa_circRNA_104064	hsa_circ_0007132	circBase	chr6	-	16326624	16328701	exonic	NM_000332	ATXN1	CCGAGCCCAGCATCCAGAGCTGCTGTTGGCGGATTGTACCCACGGGGAGATGATTCCTCA
ASCRP3009031	0.00819027	0.346574	2.00853	down	hsa_circRNA_103115	hsa_circ_0001180	circBase	chr21	+	30693541	30693835	exonic	NM_001186	BACH1	GCCAGGCTGATGGAGAGCTGAACATTACTCTTCCAGAAGAGGTTGATGATAATTAGAAGC
ASCRP3009990	0.0289343	0.391942	1.99579	down	hsa_circRNA_405330		25070500	chr15	+	44060686	44061844	exonic	NM_005313	PDIA3	GTCACTGTAAGAACCTGGAGCCCAAGTATAAAGAACTTGGCGAGAAGGCGTGATGGGAAG
ASCRP3008571	0.0214268	0.370559	1.97626	down	hsa_circRNA_100294	hsa_circ_0002286	circBase	chr1	+	107866903	107867544	exonic	NM_014917	NTNG1	GATCTCAGACATAAAGGTGCGAGGAAGGGCAATCCCTACATGTGCAATAATGAGTGTGAT
ASCRP3013306	0.0488663	0.410769	1.97506	down	hsa_circRNA_407088		25070500	chr8	-	72181974	72229924	exonic	NM_000503	EYA1	TTGTTTTCCACTCCTTGCTTACTGGGTCCTACGCCAACAGATATGGGAGGGTGCATTGTG
ASCRP3011661	0.0449437	0.410433	1.96445	down	hsa_circRNA_101506	hsa_circ_0003598	circBase	chr15	+	44053621	44055404	exonic	NM_005313	PDIA3	TCTGGTGAACGAGTATGATGATAATGGAGAATGGAATTGTCAGCCACTTGAAGAAGCAGG
ASCRP3013082	0.0274732	0.389048	1.9502	down	hsa_circRNA_101750	hsa_circ_0038381	circBase	chr16	-	19883137	19884168	exonic	NM_016235	GPRC5B	TTCTCCATGGATGAACACAATGCAGAATGTTCGTGGCATCAGAGAGAAAGATGAGAGCTC
ASCRP3001729	0.0190095	0.365735	1.94897	down	hsa_circRNA_406591		25070500	chr5	-	16779653	16783578	exonic	NM_012334	MYO10	AGAAGACAAGACAATCAGTGACCAGGAATCCTTTAGGGAAGTTATTTGGTGAAAGTGGGG
ASCRP3008557	0.00645008	0.346574	1.9479	down	hsa_circRNA_405421		25070500	chr15	+	94841429	94858866	exonic	NM_018349	MCTP2	GATCGCTGTGGAGTCATTGCAGTTTTCAGTAGAGGTGTACTTCTGAGAAGTGGCTTCTTG
ASCRP3011826	0.0215663	0.370559	1.947	down	hsa_circRNA_082546	hsa_circ_0082546	circBase	chr7	-	135611502	135635430	exonic	NM_145808	MTPN	TGAATTGTGCTACAGCTAAGCTCCAGATAAACATCATATTACTCCTCTTCTGTCTGCTGT
ASCRP3000742	0.0138613	0.361639	1.93394	down	hsa_circRNA_001682	hsa_circ_0001682	circBase	chr7	-	23023562	23030758	exonic	NM_032581	FAM126A	AAGTTATCCAGGAGCCACAAAGTGAGGTTGAAGGTTTAGAACAGATGTGGAAAAATGTTT
ASCRP3003306	0.00429111	0.346574	1.9287	down	hsa_circRNA_002744	hsa_circ_0002744	circBase	chr7	+	91924202	91981956	exonic	NM_019004	ANKIB1	ATTGTGGAAAAGGACACCTCTTCTGCTGAATGTGAAAGATGTTGCAGAAGTGTTCCAGAA
ASCRP3003325	0.0270541	0.387356	1.91803	down	hsa_circRNA_101504	hsa_circ_0002151	circBase	chr15	+	44046021	44048964	exonic	NM_005313	PDIA3	ATTTAGAGATGGTGAAGAAGCAGGTGCTTATGATGGACCTAGGACTGCTGGTGTGGACAC
ASCRP3001084	0.0305226	0.392523	1.87933	down	hsa_circRNA_002375	hsa_circ_0002375	circBase	chr12	-	88898935	88939642	exonic	NM_000899	KITLG	ACACTGTTACTTTCGTACATTGACTTGGATTCTCACTTGCATTTATCTTCAGCTGCTCCT
ASCRP3005888	0.0117934	0.355122	1.87062	down	hsa_circRNA_103606	hsa_circ_0069244	circBase	chr4	-	16587544	16760883	exonic	NM_001290	LDB2	CTACCTCAGGGATAGTGACAACCTCTGGTGGGACGCCTTTGCCACTGAATTTTTTGAAGA
ASCRP3001088	0.0467389	0.410433	1.86857	down	hsa_circRNA_405165		25070500	chr13	-	95768175	95822882	exonic	NM_005845	ABCC4	ACACTTGGATGATTTGCTGCCGCTGACGTTTTTAGATTTCATCCAGGTGTATTTGTCAAA
ASCRP3009865	0.0444034	0.410433	1.86342	down	hsa_circRNA_102888	hsa_circ_0003915	circBase	chr2	-	200233327	200298237	exonic	NM_015265	SATB2	GTACAAGAAGATTAAAGGTTTGATGATTCCTGTCTTTTGTGTCGTGGAGCAGTTGGACGG
ASCRP3004850	0.0178001	0.362157	1.86333	down	hsa_circRNA_405719		25070500	chr19	-	5214371	5220364	exonic	NM_002850	PTPRS	CATTCTGCGTCAGGACATTCTCTCTGCACAAGGAGCTATTTCATTGTGATGGTGCCACTG
ASCRP3003096	0.0055941	0.346574	1.83653	down	hsa_circRNA_071127	hsa_circ_0071127	circBase	chr4	-	149356255	149358014	exonic	NM_000901	NR3C2	ATGGGTATCCGGTCTTAGAATACATTCCAGAAAATGTATCAAGCGATGGAGACCAAAGGC
ASCRP3008175	0.00310783	0.343603	1.79793	down	hsa_circRNA_104421	hsa_circ_0004365	circBase	chr7	-	80418621	80440017	exonic	NM_006379	SEMA3C	GAGATACCATGTCCTGTTTCTCGGAACAGGACCAAGTTTTCATGATTGACTCCAAGTGTG
ASCRP3009089	0.022712	0.372163	1.7958	down	hsa_circRNA_102885	hsa_circ_0007422	circBase	chr2	-	200173482	200298237	exonic	NM_015265	SATB2	GCCGGTGCAGGTTTGATGATTCCTGTCTTTTGTGTCGTGGAGCAGTTGGACGGCTCTCTT
ASCRP3001513	0.00736398	0.346574	1.78934	down	hsa_circRNA_003925	hsa_circ_0003925	circBase	chr3	-	27385762	27394410	exonic	NM_152534	NEK10	ACTCATAAGCAGGAATGCGATGTTAATTCTGGGGCATTGATGTTTTACAATGCCTGATCA
ASCRP3003334	0.0145488	0.361639	1.76634	down	hsa_circRNA_407262		25070500	chrX	-	3735585	3747433	sense overlapping	NR_034031	LOC389906	ATTTCAACCAACAACTGTTGAAGAGGACGTGGCATTAAAACCAAGGGAAAGCAACTAGAA
ASCRP3000730	0.0429131	0.410433	1.76168	down	hsa_circRNA_406246		25070500	chr3	-	27424643	27493989	exonic	NM_003615	SLC4A7	AAGTCTCTTGCAAATTCCAGTCAAGGCCCTAAAATATAGGGTCCTGATGAAGAAGCTGTT
ASCRP3006293	0.00335798	0.343603	1.75802	down	hsa_circRNA_104420	hsa_circ_0002714	circBase	chr7	-	80418621	80435074	exonic	NM_006379	SEMA3C	CTCGGAACAGATGAGGAGCTTTTCTCTGGAATGTATATAGATTTCATGGGGACAGATGCT
ASCRP3009169	0.0327204	0.399224	1.7491	down	hsa_circRNA_104823	hsa_circ_0087540	circBase	chr9	+	96238537	96259881	exonic	NM_014612	FAM120A	GCTAAAGATGTTTTCCAGCATTCACAGGAAATCACATTCTGCCTGATGAAGATCTGGCTT
ASCRP3001356	0.00545217	0.346574	1.7453	down	hsa_circRNA_100060	hsa_circ_0010023	circBase	chr1	-	12638745	12639440	exonic	NM_004753	DHRS3	ACCGAGATGTTCCAGGGCATGAGAGTCAGGTGGGTGACATCACCATCCTGGTGAACAATG
ASCRP3001547	0.0105771	0.350535	1.74484	down	hsa_circRNA_066568	hsa_circ_0066568	circBase	chr3	-	78763546	78767033	exonic	NM_002941	ROBO1	ACTCTGACTGTTCAAGATACGAGGAGGAAAGCTCATGATCACTTACACCCGTAAAAGTGA
ASCRP3004648	0.00569244	0.346574	1.73971	down	hsa_circRNA_101836	hsa_circ_0000711	circBase	chr16	+	68155889	68160513	exonic	NM_004555	NFATC3	CATCTACTGGGGGACATCCTGTTGTGAAGATCTTGAGCCAGATGATTGTGCATCCATTTA
ASCRP3005347	0.0084232	0.346574	1.73399	down	hsa_circRNA_406837		25070500	chr6	-	125256153	125269244	exonic	NR_026876	RNF217-AS1	CCTAGCCATGCTTCTTGTTCACTCTGCGGAACTGCATGACTAAGAGATATCGTGAAATTA
ASCRP3001245	0.00126411	0.343603	1.73002	down	hsa_circRNA_400275		25242744	chr1	+	82302569	82302742	exonic	NM_012302	LPHN2	ACCAAATACAGAAGATATGAAGATCAATGATGCAGACTGATGGTTTTGATGAAGCTGGGC
ASCRP3001290	0.0353052	0.404423	1.72524	down	hsa_circRNA_008951	hsa_circ_0008951	circBase	chr7	-	22999874	23030758	exonic	NM_032581	FAM126A	ACCAGCATGTCAATAAGGGGTCATAGGTGGAAAAGACATGGTTGAAGGTTTAGAACAGAT
ASCRP3012053	0.000781914	0.343603	1.72397	down	hsa_circRNA_406549		25070500	chr4	-	149073619	149076052	exonic	NM_000901	NR3C2	TGCACCAGACCTAGTCTTTAATGACACGAAAGTCAAAGAAGTTGGGAAAGTTAAAAGGGA
ASCRP3001780	0.0249788	0.382463	1.72187	down	hsa_circRNA_104332	hsa_circ_0079619	circBase	chr7	+	24663284	24681487	exonic	NM_016447	MPP6	AGAATTGGTTGGTATACTCAAAGAACCTCACTTCCAGCAATGCAGCAAGTCTTGGAAAAC
ASCRP3005032	0.00971368	0.346574	1.70255	down	hsa_circRNA_005232	hsa_circ_0005232	circBase	chr2	-	40655612	40657441	exonic	ENST00000403092	SLC8A1	CCAGAATGATGAAATTGTGTTGTGACAGTTGGAAGTGTCATGTACAACATGCGGCGATTA
ASCRP3011329	0.0110188	0.351632	1.70147	down	hsa_circRNA_103776	hsa_circ_0071616	circBase	chr4	-	187584452	187630999	exonic	NM_005245	FAT1	TCCACAAGGATTCTTTTCAATACATCCTAAAACAGATTCCCGACAGTTAAGCAATGGGGA
ASCRP3002652	0.0390718	0.409265	1.69915	down	hsa_circRNA_104820	hsa_circ_0005218	circBase	chr9	+	96233422	96259881	exonic	NM_014612	FAM120A	ATAGCTAAAGATGTTTTCCAGCATTCACAGGTTGCACAGAGCATTGAGGATCACCATCAG
ASCRP3001258	0.0429052	0.410433	1.69641	down	hsa_circRNA_104333	hsa_circ_0001685	circBase	chr7	+	24663284	24690331	exonic	NM_016447	MPP6	ACCAAGTTATAGAGATACCATTACTCCTCAACAGCAATGCAGCAAGTCTTGGAAAACCTT
ASCRP3009158	0.0111152	0.351632	1.69273	down	hsa_circRNA_404686		25070500	chr1	+	236332005	236343328	exonic	NM_003272	GPR137B	GCGTCCATTCCTTTGATTATGACTGGTACAATGTATCAGACCAGGTGATTTTCAAAGCCA
ASCRP3004932	0.0417411	0.410433	1.69023	down	hsa_circRNA_406015		25070500	chr2	-	200188525	200193633	exonic	NM_015265	SATB2	CCAAAGTGGCTGCAAATAAAAGTCAGGGATTGTTGTCTGAGATTCTGCGTAAGGAAGAAG
ASCRP3004104	0.0161706	0.361639	1.68656	down	hsa_circRNA_102700	hsa_circ_0000994	circBase	chr2	-	40655612	40657444	exonic	NM_021097	SLC8A1	CAGAATGATGAAATTGTTAGGTTGTGACAGTTGGAAGTGTCATGTACAACATGCGGCGAT
ASCRP3002201	0.0127206	0.361639	1.68575	down	hsa_circRNA_002353	hsa_circ_0002353	circBase	chr6	-	16586010	16658132	exonic	NM_000332	ATXN1	AGGAACTGATAGCTTATGGTTCTCCATTGTGATGAAAGCACATGGTACAGCATACTGGAG
ASCRP3010605	0.0180392	0.362157	1.6848	down	hsa_circRNA_104821	hsa_circ_0001875	circBase	chr9	+	96233422	96261168	exonic	NM_014612	FAM120A	TAAGCCTATGTCATTTCATCCACCACATTACTTAGGTTGCACAGAGCATTGAGGATCACC
ASCRP3009455	0.00271277	0.343603	1.66438	down	hsa_circRNA_075650	hsa_circ_0075650	circBase	chr6	-	13632601	13659064	exonic	NM_005493	RANBP9	GGAGAGACTGTGGCAAGAACACTGCAAACAAAAAAATGTTGAAGTTACATGGGAATTGGT
ASCRP3008025	0.0213645	0.370559	1.66308	down	hsa_circRNA_000558	hsa_circ_0000558	circBase	chr14	-	89628044	89629313	intronic	ENST00000557572	FOXN3	GACTGTTCATGCGCATCGGGTGTCAGTGACTCATGGAGAAGAAATGGGGAATGGCATCAC
ASCRP3002832	0.0356917	0.404626	1.65402	down	hsa_circRNA_061405	hsa_circ_0061405	circBase	chr21	-	32537278	32575328	exonic	NM_003253	TIAM1	ATCCTCAGATGAGACTGATCACAGCAGCAAGACACATCAACTGGATCATTCTGCTCATTA
ASCRP3008978	0.0477856	0.410769	1.64872	down	hsa_circRNA_101550	hsa_circ_0035796	circBase	chr15	-	63988322	64008672	exonic	NM_003922	HERC1	GCATCACTATCAGATATCAGAAAACCAGGACTCTGCAGATGTTGATCCTCAGGAGCATTC
ASCRP3002332	0.00726169	0.346574	1.63865	down	hsa_circRNA_100717	hsa_circ_0007142	circBase	chr10	+	128768965	128788867	exonic	NM_001380	DOCK1	AGGTCACAGCCAAAATTGATTATGGAAACAGCTTTTTATAACTATGATGCCAGAGGAGCG
ASCRP3000251	0.0442407	0.410433	1.63737	down	hsa_circRNA_100719	hsa_circ_0020390	circBase	chr10	+	128768965	128836080	exonic	NM_001380	DOCK1	AAAGTCGATGGTGGTGAAGTAGTGAAGCTTTTTATAACTATGATGCCAGAGGAGCGGATG
ASCRP3007088	0.0111825	0.351632	1.63138	down	hsa_circRNA_043122	hsa_circ_0043122	circBase	chr17	+	33951415	33968994	exonic	NM_001282	AP2B1	CTTGAGTTTGGCAACACAGGTGGTGGCTAATGCCGTAGCGGCATTATCTGAAATCAGTGA
ASCRP3000877	0.0409542	0.410056	1.62201	down	hsa_circRNA_103525	hsa_circ_0001367	circBase	chr3	+	183361267	183369064	exonic	NM_017644	KLHL24	AATGATGTCCCCAAGGACTAGGCCACGCAGGTGTGGAAATTAAAAGAACACACATATTTT
ASCRP3004856	0.00185956	0.343603	1.61511	down	hsa_circRNA_104676	hsa_circ_0008035	circBase	chr8	-	118830673	118849440	exonic	NM_000127	EXT1	CATTGAAGGAGAGAGCAAGGTATGATTATCGGGAAATGCTGCACAATGCCACTTTCTGTC
ASCRP3007361	0.021613	0.370559	1.61221	down	hsa_circRNA_007315	hsa_circ_0007315	circBase	chr3	+	110863745	110866331	exonic	NM_001243288	PVRL3	GAAAGACCTATTTCAGATGTTCCATTTAAGCAGACCTCTTCCATAGCTGTAGCTGGAGCG
ASCRP3010409	0.00389904	0.343603	1.61133	down	hsa_circRNA_103306	hsa_circ_0064555	circBase	chr3	-	18419661	18462483	exonic	NM_002971	SATB1	GTTGCAGCAACCAAAAGCCAGGTGATCTTTAGACAGTGACTGAGTATGGATCATTTGAAC
ASCRP3011409	0.0142366	0.361639	1.60885	down	hsa_circRNA_102762	hsa_circ_0001030	circBase	chr2	-	72958135	72960247	exonic	NM_015189	EXOC6B	TCCTAGAGATGTACAGCAAACTGAGGGACCAGATGAAAACTAAAAGAATCAAGTGACGGA
ASCRP3005436	0.00781806	0.346574	1.6074	down	hsa_circRNA_000320	hsa_circ_0000320	circBase	chr11	-	62297840	62298224	intronic	ENST00000257247	AHNAK	CCTGAGGTAGAAGGTGAAATGAAAGTGCCAGATGTTGAAATCAAAGGACCCAAAATGGAC
ASCRP3006928	0.0132473	0.361639	1.60733	down	hsa_circRNA_103428	hsa_circ_0004639	circBase	chr3	+	110830876	110841085	exonic	NM_015480	PVRL3	CTTCAAATCTGTGTGGAGCAGGTGCCTTAGCTGGACCAATTATTGTGGAGCCACATGTCA
ASCRP3000474	0.0356911	0.404626	1.60078	down	hsa_circRNA_061343	hsa_circ_0061343	circBase	chr21	-	27347382	27369731	exonic	NM_000484	APP	AACTACATCACCGCTCTGCAGGCTGTTCCTCCTCGGTGTCCCAAAGTTTACTCAAGACTA
ASCRP3004313	0.0242464	0.378995	1.60022	down	hsa_circRNA_406739		25070500	chr6	+	15374347	15468949	exonic	NM_004973	JARID2	CAGGAAAGGAAAAACCCACAAACATGTTCACAACGGGCATGGATGACAGTGATGGGATTC
ASCRP3003728	0.00886057	0.346574	1.59994	down	hsa_circRNA_005660	hsa_circ_0005660	circBase	chr19	+	13135834	13136366	exonic	NM_002501	NFIX	CAATCAAAGAACTGGATCTTTATCTGGCTTACTTTGTCCACACTCCGGGATGAGTTCCAC
ASCRP3002076	0.00527006	0.346574	1.5975	down	hsa_circRNA_004417	hsa_circ_0004417	circBase	chr1	+	219366423	219414650	sense overlapping	NM_138794	LYPLAL1	AGCCATCCAACCTACATAAGACTATGACATCATATACTCCTATGAAAGGAGGAATCTCCA
ASCRP3011159	0.0402143	0.409265	1.59403	down	hsa_circRNA_005822	hsa_circ_0005822	circBase	chr1	+	66378927	66403383	sense overlapping	NM_002600	PDE4B	TCACAAAGTCTCTTCTGTGATTGCCGTCTTAGGTATTAAAAAGTGTCAGCAAACTGCATT
ASCRP3012520	0.00176657	0.343603	1.59346	down	hsa_circRNA_101837	hsa_circ_0039929	circBase	chr16	+	68155889	68225678	exonic	NM_004555	NFATC3	TGGTCTGCAGGACATCACTTTAGATGATGATCTTGAGCCAGATGATTGTGCATCCATTTA
ASCRP3005334	0.00308726	0.343603	1.59158	down	hsa_circRNA_058656	hsa_circ_0058656	circBase	chr2	+	232121298	232127111	exonic	NM_025139	ARMC9	CCTACATCAGCAATGACCTCTTGGACTGTTATAGCCACAACCAGGCATCCACCATGTTAC
ASCRP3007067	0.0469401	0.410433	1.58718	down	hsa_circRNA_001948	hsa_circ_0001948	circBase	chrX	-	149962163	149984551	exonic	NM_031462	CD99L2	CTTGAAGACATAGTAGGGGGTGGAGAATACAAACCTGACAAGGGTAAAGAGCCATGGGAC
ASCRP3006089	0.0145666	0.361639	1.58679	down	hsa_circRNA_402915		25242744	chr3	+	110830876	110866331	exonic	NM_001243288	PVRL3	CTCAGAAAGACCTATTTCAGGTGCCTTAGCTGGACCAATTATTGTGGAGCCACATGTCAC
ASCRP3002604	0.0165943	0.362157	1.58458	down	hsa_circRNA_078353	hsa_circ_0078353	circBase	chr6	+	155054511	155116273	exonic	NM_014892	SCAF8	ATACACTTGCGGCTGTAGCTCAGATCTTGCAAAGTCCTCAAGGCCAGCAGGCGGATCCCC
ASCRP3000119	0.0160092	0.361639	1.58219	down	hsa_circRNA_091669	hsa_circ_0091669	circBase	chrX	+	147733519	147744289	exonic	NM_002025	AFF2	AAACAAGTGAATCACTATGAACAAGACCGTAGTGCACTTAAAAAAAGGGAATGGGAGCGG
ASCRP3012104	0.0192072	0.366322	1.57963	down	hsa_circRNA_103646	hsa_circ_0001413	circBase	chr4	+	54292038	54310270	exonic	NM_030917	FIP1L1	TGCATTTCCATATGGCAATGGAGATTACCTGGGGCAATTGATGTTATCGGTCAGACTATA
ASCRP3002499	0.0186612	0.365735	1.57735	down	hsa_circRNA_002387	hsa_circ_0002387	circBase	chr3	-	170906490	170912424	exonic	NM_015028	TNIK	AGTTATTGCCTGTGATGAAAACCCAGATGCCACATATGATTTCAAGTTGGTGATGGAGTT
ASCRP3005692	0.0231889	0.374625	1.57116	down	hsa_circRNA_100515	hsa_circ_0017312	circBase	chr1	+	246795195	246797889	exonic	NM_152609	CNST	CGGCTTACGAAAATTTGTGCAACACATCAAGAATAGCAGAATCCTATTTCCAGGAGGAGG
ASCRP3006706	0.00228685	0.343603	1.56611	down	hsa_circRNA_104141	hsa_circ_0001615	circBase	chr6	-	79752559	79770535	exonic	NM_017934	PHIP	CTGGCAGACGGATATTTACTGTGAAGTATTACAGACACTTAGCACCTGATCACTTGCTGC
ASCRP3008195	0.00835089	0.346574	1.56088	down	hsa_circRNA_104367	hsa_circ_0080170	circBase	chr7	-	47451324	47467974	exonic	NM_022748	TNS3	GAGATGTCATGGGCGGGAAAGGACGCATAGGAGTGGTCATATCATCCTACATGCATTTCA
ASCRP3002878	0.00498233	0.346574	1.56007	down	hsa_circRNA_100782	hsa_circ_0000284	circBase	chr11	+	33307958	33309057	exonic	NM_005734	HIPK3	ATCTCGGTACTACAGGTATGGCCTCACAAGTCTTGGTCTACCCACCATATGTTTATCAAA
ASCRP3011501	0.0445807	0.410433	1.55855	down	hsa_circRNA_402901		25242744	chr3	-	71743025	71748859	exonic	NM_173359	EIF4E3	TCGGGGAACAGTTCACAGACTGTGCCGCAGCAGATATTTTGGAGTGTATACAATAATATC
ASCRP3012318	0.00266135	0.343603	1.55722	down	hsa_circRNA_078352	hsa_circ_0078352	circBase	chr6	-	154762425	154763424	exonic	NM_173515	CNKSR3	TGGACCTGACCACTACAGTCCAGAAGAATTATGGCCTCGAAACTGATAACATGAAGAACT
ASCRP3008755	0.0189962	0.365735	1.55682	down	hsa_circRNA_103645	hsa_circ_0069748	circBase	chr4	+	54292038	54294350	exonic	NM_030917	FIP1L1	GATTCCACCACCGGGAGATTACCTGGGGCAATTGATGTTATCGGTCAGACTATAACTATC
ASCRP3010633	0.0364308	0.405327	1.55643	down	hsa_circRNA_104494	hsa_circ_0082415	circBase	chr7	+	131113791	131130662	exonic	NM_013255	MKLN1	TAATATCAGATGGCACCAAGAAAGACTCTGGGATGGAGACTGTTTATTTGTTTGGTGGCT
ASCRP3007861	0.0473728	0.410769	1.55198	down	hsa_circRNA_092447	hsa_circ_0000807	circBase	chr17	+	75484863	75486866	sense overlapping	NM_006640	SEPT9	GACATCGAGTTTATGAAACGCCTGAGCAAGGAGGTCAACATCAACCGCAAGAAGCGCATC
ASCRP3013469	0.0162512	0.361639	1.55174	down	hsa_circRNA_105036	hsa_circ_0004369	circBase	chrX	-	149983334	149984551	exonic	NM_031462	CD99L2	TTTGGATGATCAAGATGATGGCCGCAGGAAACCGGGTATAGGAGGAAGAGAGCCATGGGA
ASCRP3004527	0.0228666	0.372346	1.55027	down	hsa_circRNA_104076	hsa_circ_0075748	circBase	chr6	-	17772138	17779330	exonic	NM_022113	KIF13A	CATAAGAAAAGGATAGCCCTGGAAGCAAGGCCTCTTCTAAGCCAGGAGGCAACTGAGGAG
ASCRP3005779	0.0316235	0.396233	1.54418	down	hsa_circRNA_104185	hsa_circ_0005771	circBase	chr6	-	128385902	128388937	exonic	NM_002844	PTPRK	CTAAAACCCAGTGCGTACGCATTGCTACAAAAGTGCTTATCAGATTGTTGTGGAAGAACT
ASCRP3000710	0.00324867	0.343603	1.54205	down	hsa_circRNA_104400	hsa_circ_0006944	circBase	chr7	+	74119495	74131270	exonic	NM_001518	GTF2I	AAGTACCAGCAGAAGGTGGTCGTGTGATGGTAACAGATGCTGACAGGTCAATACTATCTC
ASCRP3001825	0.00568629	0.346574	1.53897	down	hsa_circRNA_013058	hsa_circ_0013058	circBase	chr1	-	85331067	85331842	exonic	uc001dkl.2	LPAR3	AGACGGTGATGACTGTCTTAGCTTCTTTAAATTTCTTTCTAGGATGTTCACTTCTCCACA
ASCRP3003788	0.00937813	0.346574	1.53786	down	hsa_circRNA_104062	hsa_circ_0001578	circBase	chr6	-	13639794	13644961	exonic	NM_005493	RANBP9	CAATTTAGCATCAGGCAAAGGAAGCACCGCACATTTTTCAGCCAAATTTGTATCCTACTG
ASCRP3003458	0.0146558	0.361639	1.53407	down	hsa_circRNA_101835	hsa_circ_0005615	circBase	chr16	+	68155889	68157024	exonic	NM_004555	NFATC3	CAAAGCCTGGCCACACCCCTATATTTCGATCTTGAGCCAGATGATTGTGCATCCATTTAC
ASCRP3002845	0.0144575	0.361639	1.53349	down	hsa_circRNA_405814		25070500	chr19	+	57088080	57089646	intronic	ENST00000594953	ZNF470	ATCCTTGATTTGTCATCAGAGATGTCATACTGACTTGGAGTGTGTGTGGGTGACCAAATC
ASCRP3011873	0.00666333	0.346574	1.5334	down	hsa_circRNA_104401	hsa_circ_0005513	circBase	chr7	+	74119495	74133260	exonic	NM_032999	GTF2I	TGACTATTGAAGGTGGTCGTGTGATGGTAACAGATGCTGACAGGTCAATACTATCTCCAG
ASCRP3011707	0.0140381	0.361639	1.52915	down	hsa_circRNA_101583	hsa_circ_0006509	circBase	chr15	-	72338064	72338975	exonic	NM_006901	MYO9A	TCTTGGAGCTGGACCAGTACTTGAGTTATTTTACCAAGAAAATGGTTTGCACGACTTTGA
ASCRP3012665	0.000613762	0.343603	1.52872	down	hsa_circRNA_104061	hsa_circ_0001577	circBase	chr6	-	13632601	13644961	exonic	NM_005493	RANBP9	TGTGGCAAGAACACTGCAAACAAAAAAATGTTGAAGCCAAATTTGTATCCTACTGTGGGG
ASCRP3002741	0.0240357	0.378204	1.52707	down	hsa_circRNA_007408	hsa_circ_0007408	circBase	chr2	+	36764604	36764689	sense overlapping	NM_016441	CRIM1	ATCAACGTGGAAGGAAGTTGCTGCCCAATGTGTCCAGACCCTCTGCTCGACCGTCAGCTG
ASCRP3002343	0.0316908	0.396233	1.52596	down	hsa_circRNA_103636	hsa_circ_0001410	circBase	chr4	+	52729602	52744020	exonic	NM_015115	DCUN1D4	AGGTGCTTGGAATGGTTCTATGAATATGCAGATTTTCAGCTGAACTCTCATCTCTCAACA
ASCRP3012602	0.0274179	0.389048	1.5202	down	hsa_circRNA_406702		25070500	chr5	+	154330380	154346797	sense overlapping	NM_014180	MRPL22	TGTCCTGCAGGTGGCTGTTTTGATACTGGACTTGAATACAGTGTTATGAGTGTTTTACCT
ASCRP3004734	0.0257733	0.385121	1.51688	down	hsa_circRNA_100703	hsa_circ_0020303	circBase	chr10	-	125771848	125806240	exonic	NM_015892	CHST15	CATGCACAAGGTCTTCCAGTTTCTGAACCTAGGAAATCTGGCATTTTTTAAAGTTTGCGC
ASCRP3010602	0.0349961	0.403793	1.51656	down	hsa_circRNA_069714	hsa_circ_0069714	circBase	chr4	+	52729602	52729673	exonic	NM_015115	DCUN1D4	TAAGATCTACCACACCCTTAATAAGCTGATTTTCAGCTGAACTCTCATCTCTCAACACTG
ASCRP3000594	0.0349722	0.403793	1.51522	down	hsa_circRNA_039934	hsa_circ_0039934	circBase	chr16	+	68215377	68217269	exonic	NM_004555	NFATC3	AAGAGGAAAAAAAGCCAGTCTCAACGTTTTACTTATACACCAGATGGACGACCTCAGTGG
ASCRP3011716	0.00364477	0.343603	1.51513	down	hsa_circRNA_104153	hsa_circ_0004058	circBase	chr6	+	87925620	87928449	exonic	NM_015021	ZNF292	TCTTTCCCAGGAACCATTGGATAAGGATAAAGACACTCCTAGAATATGCAGAGAAATGGA
ASCRP3010426	0.0262561	0.385121	1.51502	down	hsa_circRNA_081001	hsa_circ_0081001	circBase	chr7	-	91755566	91756945	exonic	NM_000786	CYP51A1	GTTGGCTGCCTTTGCCTAGTTTCAGGTTTTCTTGGAGCAGAAGAAAATGTTAAAAAGTGG
ASCRP3013015	0.018099	0.362273	1.51127	down	hsa_circRNA_023016	hsa_circ_0023016	circBase	chr11	+	66413497	66413944	exonic	NM_002896	RBM4	TTCCGGTGAAATAAATGGTTTTTCAACTTAGGGTAGTGGGATGTGTGTGGGCTGAAATTC
ASCRP3001359	0.00791596	0.346574	1.51058	down	hsa_circRNA_401174		25242744	chr13	+	94482406	94482798	exonic	NM_005708	GPC6	ACCGAGTTTCCAAGAATTTTTCCGAGAGCTCCTGGAGAATGCAGAAAAGTCACTAAATGA
ASCRP3011969	0.0112308	0.351632	1.5102	down	hsa_circRNA_101491	hsa_circ_0034762	circBase	chr15	+	42103080	42105299	exonic	NM_014994	MAPKBP1	TGATCGAAGGCTTTTGGACAAGTGGGTGGAGCTGAGGGTGTGTGGTTGTGTTGTTCAATC
ASCRP3012254	0.00508289	0.346574	1.50565	down	hsa_circRNA_005715	hsa_circ_0005715	circBase	chr18	+	9208654	9239554	intronic	ENST00000578850	RP11-21J18.1	TGCTTGGTCAAAGTCCCTCAAGGAATGATACAAAAATCATCAAGAAAGAAGGTCCAGAAA
ASCRP3005771	0.0118296	0.355122	1.50494	down	hsa_circRNA_102389	hsa_circ_0001993	circBase	chr18	+	74561481	74583781	exonic	NM_007345	ZNF236	CGTTTCAAAAGCCAAGCCAGTTAACGCGACACATTAGGATACACACAGATGGAGTTTTAA
ASCRP3001156	0.0220697	0.370559	1.50115	down	hsa_circRNA_062993	hsa_circ_0062993	circBase	chr22	+	33254003	33259028	exonic	NM_000362	TIMP3	ACAGTAAAGTGGTTTTATTTCTATCACAGTCGCGTCTATGATGGCAAGATGTACACGGGG
